# Supplementary material for: Electrostatic precursor films
Source: Royal Society of Chemistry journal article supplement (doi:10.1039/c3sm51802g), 2013-01-01
Supplement: c3sm51802g_4.pdf [file c3sm51802g_4.pdf]

## Supplementary Material

### S4 Order of Magnitude Analysis

As a quantitative comparison, the scaling analysis between these three works, we can compare the capillary pressures and disjoining pressure in these works. The total pressure in the film can be expressed as

$$P = P_a - \gamma \frac{1}{r} \frac{\partial}{\partial r} \left( r \frac{\partial h}{\partial r} \right) + \varepsilon V_o^2 \frac{1}{h^2} \quad (1)$$

Considering the following dimensionless parameters:

$$\bar{r} = \frac{r}{r^*}, \quad \bar{h} = \frac{h}{h^*} \quad (2)$$

Substituting (2) in (1), we have the pressure based on dimensionless parameters as

$$P = 1 - \frac{\gamma h^*}{r^{*2}} \frac{1}{\bar{r}} \frac{\partial}{\partial \bar{r}} \left( \bar{r} \frac{\partial \bar{h}}{\partial \bar{r}} \right) + \frac{\varepsilon V_o^2}{h^{*2}} \frac{1}{\bar{h}} \quad (3)$$

(3) includes two parameters:

$$\frac{\gamma h^*}{r^{*2}}, \quad \frac{\varepsilon V_o^2}{h^{*2}}$$

$\frac{\gamma h^*}{r^{*2}}$ , gives the strength of capillary and  $\frac{\varepsilon V_o^2}{h^{*2}}$  estimates the strength of electrostatic disjoining pressure.

In the present work, the capillary force  $\frac{\gamma h^*}{r^{*2}} \sim \frac{20 \frac{mN}{m} \times 10^{-8} m}{10^{-4} m}$ . The capillary force is in the order of  $\frac{\gamma h^*}{r^{*2}} \sim O(10^{-6} \frac{N}{m^2})$ . The electrostatic pressure,  $\frac{\varepsilon V_o^2}{h^{*2}} \sim \frac{8.85 \times 2.7 \times 10^{-12} \times 10^{-2}}{10^{-16}}$ , is in the order of  $O(10^3 \frac{N}{m^2})$ . The capillary force can be ignored here.
